# Supplementary material for: A Cascade of Wnt, Eda, and Shh Signaling Is Essential for Touch Dome Merkel Cell Development
Source: PubMed Central journal article supplement (PMC4944988; doi:10.1371/journal.pgen.1006150), 2016-07-14
Supplement: pgen.1006150.s007.pdf [file pgen.1006150.s007.pdf]

**Table S1. Primers used for quantitative RT-PCR.**

| <b>Gene</b>  | <b>Gene ID</b> | <b>Forward Primer</b>  | <b>Reverse Primer</b>  |
|--------------|----------------|------------------------|------------------------|
| <i>Actin</i> | 11461          | TGGCGCTTTTGACTCAGGAT   | GGGATGTTTGCTCCAACCAA   |
| <i>Sox2</i>  | 20674          | GCGGAGTGGAAACTTTTGTCC  | CGGGAAGCGTGTACTTATCCTT |
| <i>Atoh1</i> | 11921          | ATCCCGTCCTTCAACAACGAC  | CTCTCCGACATTGGGAGTCTG  |
| <i>Shh</i>   | 20423          | TGGAAGCAGGTTTCGACTGG   | CTCCGGGACGTAAGTCCTTCA  |
| <i>Gli1</i>  | 14632          | CTCGACCTGCAAACCGTAATC  | TCCTAAAGAAGGGCTCATGGTA |
| <i>Edar</i>  | 13608          | ACTCCAACCTGTGGTGAGAACG | CGTCGTCTTTAGTGCCGTATC  |
| <i>K8</i>    | 16691          | CAAGGTGGAAGTAGAGTCCCG  | CTCGTACTGGGCACGAACTTC  |
| <i>Eda</i>   | 13607          | GTGGACGGCACCTACTTCATC  | CACCATCTTCACGGCGATTT   |
